# Supplementary material for: Occurrence of cfr-Positive Linezolid-Susceptible Staphylococcus aureus and Non-aureus Staphylococcal Isolates from Pig Farms
Source: Antibiotics (Basel). 2023 Feb 9;12(2):359. doi: 10.3390/antibiotics12020359 (PMC9952267; doi:10.3390/antibiotics12020359)
Supplement: Supplementary file 1 [file antibiotics-12-00359-s001.zip › antibiotics-2198635-supplementary tables.pdf]

**Table S1. Primer sets for 23S rRNA and ribosomal proteins in staphylococci**

|                 | Primer           | Sequence (5'-3')       |
|-----------------|------------------|------------------------|
| <b>23S rRNA</b> | <b>SA-23S-F</b>  | CGATTTGGGCACTGTCTCA    |
|                 | <b>SA-23S-R</b>  | TGTGAACTCTTGGGGGAGAT   |
|                 | <b>SE-23S-F</b>  | CCCTAGCTGTGTTGGCTTTC   |
|                 | <b>SE-23S-R</b>  | TCGTCATCTTCGAGGGATCT   |
|                 | <b>SSC-23S-F</b> | GTTCCCTCAGAATGGTTGGA   |
|                 | <b>SSC-23S-R</b> | GTGCTTACACCCCGAACCTA   |
|                 | <b>SSM-23S-F</b> | GCATAAGGGAGCTTGACTGC   |
|                 | <b>SSM-23S-R</b> | TCAGCACTTATCCCGTCCAT   |
| <b>L3</b>       | <b>SA-L3-F</b>   | AGGAGGTGGACTTTTCGATGA  |
|                 | <b>SA-L3-R</b>   | TCCTTTTTGCTTCCATGGTT   |
|                 | <b>SE-L3-F</b>   | TCTCGTGAACAATTCGAACAA  |
|                 | <b>SE-L3-R</b>   | GCCATTATGCAATTCCTCCT   |
|                 | <b>SSC-L3-F</b>  | CGTGAACAATTCGAACAACG   |
|                 | <b>SSC-L3-R</b>  | ACCTTGCGTAATGAAGCAC    |
|                 | <b>SSM-L3-F</b>  | CTCGTGAGCAATTCGAACAA   |
|                 | <b>SSM-L3-R</b>  | TGCATTTTCCTCCTTTCGTT   |
| <b>L4</b>       | <b>SA-L4-F</b>   | CAGGACGTATGGGTGGAAAC   |
|                 | <b>SA-L4-R</b>   | CAACTGCCATTTTCACTTGTGT |
|                 | <b>SE-L4-F</b>   | GAAGCGAAAGGAGGAAATTG   |
|                 | <b>SE-L4-R</b>   | TCGAAGATTTCTTCAACAGCAA |
|                 | <b>SSC-L4-F</b>  | GGTAACGTGCCAGGTCCTAA   |
|                 | <b>SSC-L4-R</b>  | GAAAATTTCTTCGATTGCGATT |
|                 | <b>SSM-L4-F</b>  | AAAGGTAATGTGCCTGGTCCT  |
|                 | <b>SSM-L4-R</b>  | TCGCACGTGTATCTACATCAA  |
| <b>L22</b>      | <b>SA-L22-F</b>  | GCTCAAGAAGGAAGCGAAAA   |
|                 | <b>SA-L22-R</b>  | CGCATTTAATTTGTTGCGTA   |
|                 | <b>SE-L22-F</b>  | CATTGGCCATACTTTTGCAG   |
|                 | <b>SE-L22-R</b>  | GCAATATTGATGCGATTTGCT  |
|                 | <b>SSC-L22-F</b> | TGGTCTCGTCGTTCAACAGT   |
|                 | <b>SSC-L22-R</b> | TTTGCTGCACGTTCAATTC    |
|                 | <b>SSM-L22-F</b> | ACATGCTGCAGACGACAAAA   |
|                 | <b>SSM-L22-R</b> | CCATTTAGCGTCCCAATCAC   |

**Table S2. Comparative analyses of domain V in 23S rRNA and ribosomal proteins**

**23S rRNA of *S. aureus***

|           |                                                              |
|-----------|--------------------------------------------------------------|
| ATCC25923 | AGTTCCGACCCGCACGAAAGGCGTAACGATTTGGGCACTGTCTCAACGAGAGACTCGGTG |
| SA2       | *****                                                        |
| SA3       | *****                                                        |
| SA12      | *****                                                        |
| SA16      | *****                                                        |
| SA17      | *****                                                        |
| SA18      | *****                                                        |
| SA19      | *****                                                        |
| SA20      | *****                                                        |
| SA21      | *****                                                        |
| ATCC25923 | AAATCATAGTACCTGTGAAGATGCAGGTTACCCGCGACAGGACGGAAGACCCCGTGGAG  |
| SA2       | *****                                                        |
| SA3       | *****                                                        |
| SA12      | *****                                                        |
| SA16      | *****                                                        |
| SA17      | *****                                                        |
| SA18      | *****                                                        |
| SA19      | *****                                                        |
| SA20      | *****                                                        |
| SA21      | *****                                                        |
| ATCC25923 | CTTTACTGTAGCCTGATATTGAAATTCGGCACAGCTTGTACAGGATAGGTAGGAGCCTTT |
| SA2       | *****                                                        |
| SA3       | *****                                                        |
| SA12      | *****                                                        |
| SA16      | *****                                                        |
| SA17      | *****                                                        |
| SA18      | *****                                                        |
| SA19      | *****                                                        |
| SA20      | *****                                                        |
| SA21      | *****                                                        |
| ATCC25923 | GAAACGTGAGCGCTAGCTTACGTGGAGGCGCTGGTGGGATACTACCCTAGCTGTGTGGC  |
| SA2       | *****                                                        |
| SA3       | *****                                                        |
| SA12      | *****                                                        |
| SA16      | *****                                                        |
| SA17      | *****                                                        |
| SA18      | *****                                                        |
| SA19      | *****                                                        |
| SA20      | *****                                                        |
| SA21      | *****                                                        |
| ATCC25923 | TTTCTAACCCGCACCACTTATCGTGGTGGGAGACAGTGTTCAGGCGGCAGTTTGACTGGG |
| SA2       | *****                                                        |
| SA3       | *****                                                        |
| SA12      | *****                                                        |
| SA16      | *****                                                        |
| SA17      | *****                                                        |
| SA18      | *****                                                        |
| SA19      | *****                                                        |
| SA20      | *****                                                        |
| SA21      | *****                                                        |
| ATCC25923 | GCGGTCGCCCTCCTAAAAGGTAACGGAGGCGCTCAAAGGTTCCCTCAGAATGGTTGGAAT |
| SA2       | *****                                                        |
| SA3       | *****                                                        |
| SA12      | *****                                                        |

SA16 \*\*\*\*\*  
SA17 \*\*\*\*\*  
SA18 \*\*\*\*\*  
SA19 \*\*\*\*\*  
SA20 \*\*\*\*\*  
SA21 \*\*\*\*\*

ATCC25923 CATTTCATAGAGTGTAAGGCATAAGGGAGCTTGACTGCGAGACCTACAAGTCGAGCAGGG  
SA2 \*\*\*\*\*  
SA3 \*\*\*\*\*  
SA12 \*\*\*\*\*  
SA16 \*\*\*\*\*  
SA17 \*\*\*\*\*  
SA18 \*\*\*\*\*  
SA19 \*\*\*\*\*  
SA20 \*\*\*\*\*  
SA21 \*\*\*\*\*

ATCC25923 TCGAAAGACGGACTTAGTGATCCGGTGGTTCCGCATGGAAGGGCCATCGCTCAACGGATA  
SA2 \*\*\*\*\*  
SA3 \*\*\*\*\*  
SA12 \*\*\*\*\*  
SA16 \*\*\*\*\*  
SA17 \*\*\*\*\*  
SA18 \*\*\*\*\*  
SA19 \*\*\*\*\*  
SA20 \*\*\*\*\*  
SA21 \*\*\*\*\*

ATCC25923 AAAGCTACCCCGGGGATAACAGGCTTATCTCCCCAAGAGTTCACATCGACGGGGAGGTT  
SA2 \*\*\*\*\*  
SA3 \*\*\*\*\*  
SA12 \*\*\*\*\*  
SA16 \*\*\*\*\*  
SA17 \*\*\*\*\*  
SA18 \*\*\*\*\*  
SA19 \*\*\*\*\*  
SA20 \*\*\*\*\*  
SA21 \*\*\*\*\*

ATCC25923 TGGCACCTCGATGTCGGCTCATCGCATCCTGGGGCTG  
SA2 \*\*\*\*\*  
SA3 \*\*\*\*\*  
SA12 \*\*\*\*\*  
SA16 \*\*\*\*\*  
SA17 \*\*\*\*\*  
SA18 \*\*\*\*\*  
SA19 \*\*\*\*\*  
SA20 \*\*\*\*\*  
SA21 \*\*\*\*\*

### 23S rRNA of *S. epidermidis*

```
ATCC12228      CGCTAGCTTACGTGGAGGCGTTGGTGGGATACTACCCTAGCTGTGTTGGCTTTCTAACCC
SE7            *****
SE9            *****
SE10           *****

ATCC12228      GCACCACTTATCGTGGTGGGAGACAGTGTGAGCGGGCAGTTTGACTGGGGCGGTCGCCT
SE7            *****
SE9            *****
SE10           *****

ATCC12228      CCTAAAAGGTAACGGAGGCGCTCAAAGGTTCCCTCAGAATGGTTGAAATCATTATAGA
SE7            *****
SE9            *****
SE10           *****

ATCC12228      GTGTAAAGGCATAAGGGAGCTTGACTGCGAGACCTACAAGTCGAGCAGGGTCGAAAGACG
SE7            *****
SE9            *****
SE10           *****

ATCC12228      GACTTAGTGATCCGGTGGTTCGCGATGGAAGGGCCATCGCTCAACGGATAAAAGCTACCC
SE7            *****
SE9            *****
SE10           *****

ATCC12228      CGGGGATAACAGGCTTATCTCCCCCAAGAGTTCACATCGACGGGGAGGTTTGGCACCTCG
SE7            *****
SE9            *****
SE10           *****

ATCC12228      ATGTCGGCTCATCGCATCCTGGGGCTGTAGTCGGTCCCAAGGGTTGGGCTGTTGCCCCAT
SE7            *****
SE9            *****
SE10           *****

ATCC12228      TAAAGCGGTACGCGAGCTGGGTTCAGAACGTCGTGAGACAGTTCGGTCCCTATCCGTCGT
SE7            *****
SE9            *****
SE10           *****

ATCC12228      GGGCGTAGGAAATTTGAGAGGAGCTGTCCTTAGTACGAGAGGACCGGGATGGACATACCT
SE7            *****
SE9            *****
SE10           *****

ATCC12228      CTGGTGTACCAGTTGTCGTGCCAACGGCATAGCTGGGTAGCTATGTATGGACGGGATAAG
SE7            *****
SE9            *****
SE10           *****

ATCC12228      TGCTGAAAGCATCTAAGCATGAAGCCCCCTCAAGATGAGATTTCCTCAACTTCGGTTATA
SE7            *****
SE9            *****
SE10           *****

ATCC12228      AGATCCCTCGAAGATGACGA
SE7            *****
SE9            *****
SE10           *****
```

### 23S rRNA of *S. sciuri*

```
NCTC12103    AAGGTTCCCTCAGAATGGTTGGAAATCATTTCGCAGAGTGTAAGGCACAAGGGAGCTTGA
SSC1         *****
SSC2         *****

NCTC12103    CTGCGAGACCTACAAGTCGAGCAGGGTCGAAAGACGGACTTAGTGATCCGGTGGTTCCGC
SSC1         *****
SSC2         *****

NCTC12103    ATGGAAGGGCCATCGCTCAACGATAAAAGCTACCCCGGGGATAACAGGCTTATCTCCCC
SSC1         *****
SSC2         *****

NCTC12103    CAAGAGTTTACATCGACGGGGAGGTTTGGCACCTCGATGTCGGCTCATCGCATCCTGGGG
SSC1         *****
SSC2         *****

NCTC12103    CTGTAGTCGGTCCCAAGGTTGGGCTGTTGCCCCATTAAAGCGGTACGCGAGCTGGGTTC
SSC1         *****
SSC2         *****

NCTC12103    AGAACGTCGTGAGACAGTTTCGGTCCCTATCCGTCGTGGGCGTAGGAAATTTGAGAGGAGC
SSC1         *****
SSC2         *****

NCTC12103    TGTCCTTAGTACGAGAGGACCGGGATGGACATACCTCTGGTGTACCAGTTGTCGCGCCAG
SSC1         *****
SSC2         *****

NCTC12103    CGGCATAGCTGGGTAGCTATGTATGGACGGGATAAGTGCTGAAAGCATCTAAGCATGAAG
SSC1         *****
SSC2         *****

NCTC12103    CCCCCCTCAAGATGAGATTTCCCAACTTCGGTTATAAGATCCCTCAAAGATGATGAGGTT
SSC1         *****
SSC2         *****

NCTC12103    AATAGGTTCGGGGTGTAAGCAC
SSC1         *****
SSC2         *****
```

### 23S rRNA of *S. simulans*

```
ATCC11046    GCATAAGGGAGCTTGACTGCGAGACCTACAAGTCGAGCAGGGTCGAAAGACGGACTTAGT
SSM1          *****

ATCC11046    GATCCGGTGGTTCCGCATGGAAGGGCCATCGCTCAACGGATAAAAGCTACCCCGGGGATA
SSM1          *****

ATCC11046    ACAGGCTTATCTCCCCAAGAGTTCACATCGACGGGGAGGTTTGGCACCTCGATGTCGGC
SSM1          *****

ATCC11046    TCATCGCATCCTGGGGCTGTAGTCGGTCCCAAGGGTTGGGCTGTTCGCCCATTAAGCGG
SSM1          *****

ATCC11046    TACGCGAGCTGGGTTCAGAACGTCGTGAGACAGTTCGGTCCCTATCCGTCGTGGGCGTAG
SSM1          *****

ATCC11046    GAAATTTGAGAGGAGCTGTCCTTAGTACGAGAGGACCGGGATGGACATACCTCTGGTGTA
SSM1          *****

ATCC11046    CCAGTTGTCGTGCCAACGGCATAGCTGGGTAGCTATGTATGGACGGGATAAGTGCTGA
SSM1          *****
```

### L3 of *S. aureus*

ATCC25923 AGGAGGTGGACTTTCGATGACCAAAGGAATCTTAGGAAGAAAAATTGGGATGACACAAGT  
SA2 \*\*\*\*\*  
SA3 \*\*\*\*\*  
SA12 \*\*\*\*\*  
SA16 \*\*\*\*\*  
SA17 \*\*\*\*\*  
SA18 \*\*\*\*\*  
SA19 \*\*\*\*\*  
SA20 \*\*\*\*\*  
SA21 \*\*\*\*\*

ATCC25923 ATTCGAGAGAAAACGGTGAATTAATCCCTGTAACAGTAGTAGAAGCTAAAGAAAAATGTTGT  
SA2 \*\*\*\*\*  
SA3 \*\*\*\*\*  
SA12 \*\*\*\*\*  
SA16 \*\*\*\*\*  
SA17 \*\*\*\*\*  
SA18 \*\*\*\*\*  
SA19 \*\*\*\*\*  
SA20 \*\*\*\*\*  
SA21 \*\*\*\*\*

ATCC25923 ATTACAAAAGAAAAGCTGTAGAAGTTGATGGATACAACGCAATCCAAGTTGGATTGAAGA  
SA2 \*\*\*\*\*  
SA3 \*\*\*\*\*  
SA12 \*\*\*\*\*  
SA16 \*\*\*\*\*  
SA17 \*\*\*\*\*  
SA18 \*\*\*\*\*  
SA19 \*\*\*\*\*  
SA20 \*\*\*\*\*  
SA21 \*\*\*\*\*

ATCC25923 CAAAAAAGCATACAAAAAAGATGCAAAATCTAACAAATATGCTAATAAACAGCTGAAGG  
SA2 \*\*\*\*\*  
SA3 \*\*\*\*\*  
SA12 \*\*\*\*\*  
SA16 \*\*\*\*\*  
SA17 \*\*\*\*\*  
SA18 \*\*\*\*\*  
SA19 \*\*\*\*\*  
SA20 \*\*\*\*\*  
SA21 \*\*\*\*\*

ATCC25923 TCACGCTAAAAAAGCTGACGCAGCACCTAAGCGCTTCATTTCGTGAATTCGCAATGTAGA  
SA2 \*\*\*\*\*  
SA3 \*\*\*\*\*  
SA12 \*\*\*\*\*  
SA16 \*\*\*\*\*  
SA17 \*\*\*\*\*  
SA18 \*\*\*\*\*  
SA19 \*\*\*\*\*  
SA20 \*\*\*\*\*  
SA21 \*\*\*\*\*

ATCC25923 CGTGGATGCTTACGAAGTAGGTCAAGAAGTCTCAGTAGATACTTTGTAGCTGGCGACGT  
SA2 \*\*\*\*\*  
SA3 \*\*\*\*\*  
SA12 \*\*\*\*\*  
SA16 \*\*\*\*\*  
SA17 \*\*\*\*\*  
SA18 \*\*\*\*\*  
SA19 \*\*\*\*\*  
SA20 \*\*\*\*\*

|           |                                                              |
|-----------|--------------------------------------------------------------|
| SA21      | *****                                                        |
| ATCC25923 | TATTGACGTAACAGGCGTATCAAAAGGTAAAGGTTTCCAAGGTGCAATTAAACGCCACGG |
| SA2       | *****                                                        |
| SA3       | *****                                                        |
| SA12      | *****                                                        |
| SA16      | *****                                                        |
| SA17      | *****                                                        |
| SA18      | *****                                                        |
| SA19      | *****                                                        |
| SA20      | *****                                                        |
| SA21      | *****                                                        |
| ATCC25923 | ACAATCTCGTGACCTATGTCACACGGTTCTCATTTCCACAGAGCACCAGGTTCTGTAGG  |
| SA2       | *****                                                        |
| SA3       | *****                                                        |
| SA12      | *****                                                        |
| SA16      | *****                                                        |
| SA17      | *****                                                        |
| SA18      | *****                                                        |
| SA19      | *****                                                        |
| SA20      | *****                                                        |
| SA21      | *****                                                        |
| ATCC25923 | TATGGCTTCAGATGCTTCTAGAGTATTCAAAGGCCAAAAAATGCCAGGACGTATGGGTGG |
| SA2       | *****                                                        |
| SA3       | *****                                                        |
| SA12      | *****                                                        |
| SA16      | *****                                                        |
| SA17      | *****                                                        |
| SA18      | *****                                                        |
| SA19      | *****                                                        |
| SA20      | *****                                                        |
| SA21      | *****                                                        |
| ATCC25923 | AAACACTGTAAGTTTCAAACTTAGAAGTAGTTCAAGTTGACACAGAAAACAAAGTTAT   |
| SA2       | *****                                                        |
| SA3       | *****                                                        |
| SA12      | *****                                                        |
| SA16      | *****                                                        |
| SA17      | *****                                                        |
| SA18      | *****                                                        |
| SA19      | *****                                                        |
| SA20      | *****                                                        |
| SA21      | *****                                                        |
| ATCC25923 | CTTAGTAAAAGGTAATGTACCTGGACCTAAAAAGGTTTAGTAGAAATCAGAACTTCAAT  |
| SA2       | *****                                                        |
| SA3       | *****                                                        |
| SA12      | *****                                                        |
| SA16      | *****                                                        |
| SA17      | *****                                                        |
| SA18      | *****                                                        |
| SA19      | *****                                                        |
| SA20      | *****                                                        |
| SA21      | *****                                                        |
| ATCC25923 | TAAAAAAGGTAATAAATAATAAGAGTGAAAGGAGGAAATGCATAATGGCTAATTATGAT  |
| SA2       | *****                                                        |
| SA3       | *****                                                        |
| SA12      | *****                                                        |
| SA16      | *****                                                        |
| SA17      | *****                                                        |
| SA18      | *****                                                        |
| SA19      | *****                                                        |
| SA20      | *****                                                        |
| SA21      | *****                                                        |

|           |                                                              |
|-----------|--------------------------------------------------------------|
| ATCC25923 | GTTTTAAAATTAGACGGAACATAATCAGGTTCAATCGAATTAAGCGATGCAGTATTCGGT |
| SA2       | *****                                                        |
| SA3       | *****                                                        |
| SA12      | *****                                                        |
| SA16      | *****                                                        |
| SA17      | *****                                                        |
| SA18      | *****                                                        |
| SA19      | *****                                                        |
| SA20      | *****                                                        |
| SA21      | *****                                                        |

|           |                                                               |
|-----------|---------------------------------------------------------------|
| ATCC25923 | ATTGAGCCAAATAATAGCGTTTTATTCTGAAGCTATTAATTTACAACGTGCTTCATTACGT |
| SA2       | *****                                                         |
| SA3       | *****                                                         |
| SA12      | *****                                                         |
| SA16      | *****                                                         |
| SA17      | *****                                                         |
| SA18      | *****                                                         |
| SA19      | *****                                                         |
| SA20      | *****                                                         |
| SA21      | *****                                                         |

|           |                                                              |
|-----------|--------------------------------------------------------------|
| ATCC25923 | CAAGGTACGCATGCTGTTAAGAATCGTTCAGCAGTAAGCGGTGGCGGACGTAAACCATGG |
| SA2       | *****                                                        |
| SA3       | *****                                                        |
| SA12      | *****                                                        |
| SA16      | *****                                                        |
| SA17      | *****                                                        |
| SA18      | *****                                                        |
| SA19      | *****                                                        |
| SA20      | *****                                                        |
| SA21      | *****                                                        |

|           |              |
|-----------|--------------|
| ATCC25923 | AAGCAAAAAGGA |
| SA2       | *****        |
| SA3       | *****        |
| SA12      | *****        |
| SA16      | *****        |
| SA17      | *****        |
| SA18      | *****        |
| SA19      | *****        |
| SA20      | *****        |
| SA21      | *****        |

### L3 of *S. epidermidis*

|           |                                                               |
|-----------|---------------------------------------------------------------|
| ATCC12228 | TCTCGTGAACAATTCGAACACGCTACTCATAAACGTTTAATCGACATTGTTAATCCAACA  |
| SE7       | *****                                                         |
| SE9       | *****                                                         |
| SE10      | *****                                                         |
| ATCC12228 | CCTAAACGGTAGATGCTCTAATGGGCTTAAACTTACCATCAGGTGTAGACATCGAAATT   |
| SE7       | *****                                                         |
| SE9       | *****                                                         |
| SE10      | *****                                                         |
| ATCC12228 | AAATTATAATAGAACAAATATAGGAGGTGGACTTTCGATGACCAAAGGAATCTTAGGAAGA |
| SE7       | *****                                                         |
| SE9       | *****                                                         |
| SE10      | *****                                                         |
| ATCC12228 | AAAATTGGGATGACACAAGTTTTCGGTGAAAATGGTGAATTAATCCCTGTAACAGTTGTA  |
| SE7       | *****                                                         |
| SE9       | *****                                                         |
| SE10      | *****                                                         |
| ATCC12228 | GAAGCTAGTCAAAACGTTGTATTACAAAAGAAAAGTGAAGAAGTTGATGGTTATAATGCT  |
| SE7       | *****                                                         |
| SE9       | *****                                                         |
| SE10      | *****                                                         |
| ATCC12228 | ATCCAAGTAGGTTTGAAGATAAAACAAGCATATAAGAAAGGTTCTAAATCTAATAAATAT  |
| SE7       | *****                                                         |
| SE9       | *****                                                         |
| SE10      | *****                                                         |
| ATCC12228 | GCTAATAAACCGCTGAAGGTCATGCTAAAAAGCTGACACAGCACCTAAGCGCTTCATT    |
| SE7       | *****                                                         |
| SE9       | *****                                                         |
| SE10      | *****                                                         |
| ATCC12228 | CGTGAATTCCGCAACGTTAACGTTGACGAATACGAAGTAGGTCAAGAAGTCTCAGTTGAT  |
| SE7       | *****                                                         |
| SE9       | *****                                                         |
| SE10      | *****                                                         |
| ATCC12228 | ACATTCGAAACTGGTGACATCATTTGATGTTACAGGCGTTTCAAAGGTAAAGGTTTCCAA  |
| SE7       | *****                                                         |
| SE9       | *****                                                         |
| SE10      | *****                                                         |
| ATCC12228 | GGTGCTATTAAACGTCATGGACAAGGTCGTGGACCAATGGCTCACGGTTCTCATTTCCAT  |
| SE7       | *****                                                         |
| SE9       | *****                                                         |
| SE10      | *****                                                         |
| ATCC12228 | AGAGCGCCAGGCTCTGTAGGTATGGCATCAGACGCTTCAAAGTGTTTAAAGGACAAAAA   |
| SE7       | *****                                                         |
| SE9       | *****                                                         |
| SE10      | *****                                                         |
| ATCC12228 | ATGCCAGGACGTATGGGTGGAACACTGTTACTGTTCAAACCTTAGAAGTCGTTCAAGTT   |
| SE7       | *****                                                         |
| SE9       | *****                                                         |
| SE10      | *****                                                         |
| ATCC12228 | GACACTGAAAATAGTGTGATTTTAGTAAAAGGCAATGTACCTGGACCTAAAAAAGGTTTA  |
| SE7       | *****                                                         |
| SE9       | *****                                                         |
| SE10      | *****                                                         |

|           |                                                             |
|-----------|-------------------------------------------------------------|
| ATCC12228 | GTAGAAATCACAACTTCAATAAAAAAGGTAATAAATAATTAAGAAGCGAAAGGAGGAAA |
| SE7       | *****                                                       |
| SE9       | *****                                                       |
| SE10      | *****                                                       |

|           |              |
|-----------|--------------|
| ATCC12228 | TTGCATAATGGC |
| SE7       | *****        |
| SE9       | *****        |
| SE10      | *****        |

### L3 of *S. sciuri*

|           |                                                                |
|-----------|----------------------------------------------------------------|
| NCTC12103 | CGTGAACAATTCTGAACAACGTACGCATAAACGTTTAATCGACATTCTTAACCCTACACCA  |
| SSC1      | *****                                                          |
| SSC2      | *****                                                          |
| NCTC12103 | AAAACAGTTGATGCTCTTATGGGCTTAAACTTACCATCAGGTGTAGACATCGAAATCAAA   |
| SSC1      | *****                                                          |
| SSC2      | *****                                                          |
| NCTC12103 | TTATAATTCATTAAAATAACAGGAGGTGCGACTTTCGATGACCAAAGGAATCTTAGGAAG   |
| SSC1      | *****                                                          |
| SSC2      | *****                                                          |
| NCTC12103 | AAAAATTGGAATGACACAAGTATTTCGCAGAAAACGGTGAATTAAATACCAGTTACTGTAGT |
| SSC1      | *****                                                          |
| SSC2      | *****                                                          |
| NCTC12103 | AGAAGCTAGTCAAAACGTAGTATTACAACTAAAACTGAAGAAGTGGACGGCTACAACGC    |
| SSC1      | *****                                                          |
| SSC2      | *****                                                          |
| NCTC12103 | TGTTCAAATCGGTTTTGAAGACAAACAAGCATATAAAAAAGATCGTAAATCTAACAAATA   |
| SSC1      | *****                                                          |
| SSC2      | *****                                                          |
| NCTC12103 | TGCTACTAAAGCTGCTGAAGGCCATGCTAAAAAAGCAGGTACAGCACCTAAGCGCTTCAC   |
| SSC1      | *****                                                          |
| SSC2      | *****                                                          |
| NCTC12103 | TCGTGAATTCAGAAACATTGATGTTTCAGCATACGAGGTAGGTCAAGAAGTCACTGTAGA   |
| SSC1      | *****                                                          |
| SSC2      | *****                                                          |
| NCTC12103 | TACTTTCCAAGCAGGAGACATTATTGATGCAACAGGCGTTTCAAAGGTAAAGGTTTCCA    |
| SSC1      | *****                                                          |
| SSC2      | *****                                                          |
| NCTC12103 | AGGCTCAATTAAACGTCACGGATTCTCTCGTGGACCAATGAGTCACGGTTCTCGTTACCA   |
| SSC1      | *****                                                          |
| SSC2      | *****                                                          |
| NCTC12103 | CAGAGGCTCTGGTTCAATGGGTATGGCTTCAGATGCTTCTAAAGTATTTAAAGGTAAAGA   |
| SSC1      | *****                                                          |
| SSC2      | *****                                                          |
| NCTC12103 | ATTACCAGGCCGTATGGGCGGAAACACAGTTACTATGCAAACTTAGAAGTAGTTAAAGT    |
| SSC1      | *****                                                          |
| SSC2      | *****                                                          |
| NCTC12103 | TGATGCAGAAAATAACGTAATTTTAGTTAAAGGTAACGTGCCAGGTCCTAAAAAAGGTTT   |
| SSC1      | *****                                                          |
| SSC2      | *****                                                          |
| NCTC12103 | AGTAAAACTTACAACCTCAATTAAAAAAGGTAATAAATAATTATTTAGGTGAAAGGAGGA   |
| SSC1      | *****                                                          |
| SSC2      | *****                                                          |
| NCTC12103 | AACAACATTATGGCTAATATTGATGTATTAAGTAGATGGATCAAAATCAGGTTCTATC     |
| SSC1      | *****                                                          |
| SSC2      | *****                                                          |
| NCTC12103 | GAATTAAATGATAGTGTATTTGGTATCGAACCAACCAACACGTATTATTCGAAGCAGTC    |
| SSC1      | *****                                                          |
| SSC2      | *****                                                          |

|           |                                |
|-----------|--------------------------------|
| NCTC12103 | AACTTACAACGTGCTTCATTACGCCAAGGT |
| SSC1      | *****                          |
| SSC2      | *****                          |

### L3 of *S. simulans*

|                   |                                                                       |
|-------------------|-----------------------------------------------------------------------|
| ATCC11046<br>SSM1 | CTCGTGAGCAATTCTGAACAACGTACTCATAAACGTTTAATCGACATTGTTAACCTACAC<br>***** |
| ATCC11046<br>SSM1 | CAAAACTGTTGATGCTCTTATGGGCTTAACTTACCATCAGGTGTAGACATCGAAATTA<br>*****   |
| ATCC11046<br>SSM1 | AATTATAATAGAAAATCATAGGAGGTGGACTTTCGATGACCAAAGGAATCTTAGGAAGAA<br>***** |
| ATCC11046<br>SSM1 | AAATCGGGATGACACAAGTATTCGGTGAAAACGGAGACTTAATCCCAGTAACGTAGTAG<br>*****  |
| ATCC11046<br>SSM1 | AAGCAGGACAAAACGTAGTATTACAAAAGAACTGAAGAGGTAGACGGTTACAACGCTA<br>*****   |
| ATCC11046<br>SSM1 | TCCAAGTAGGTTTGAAGACAAACAAGCATACAAAAAGACAGCAAGTCAAATAAATATG<br>*****   |
| ATCC11046<br>SSM1 | CTAATAAACCCAGCTGAAGGTCACGCTAAAAAGCTGACACAGCTCCTAAGCGCTTCATTC<br>***** |
| ATCC11046<br>SSM1 | GTGAATTCAGAAACATCAATGTTGATGAATACGAAGTAGGTCAAGAAGTCTCAGTTGATA<br>***** |
| ATCC11046<br>SSM1 | CATTTGAAGCTGGGGACATCATTGACGTAACGGAGTATCTAAAGGTAAAGGTTCCAAG<br>*****   |
| ATCC11046<br>SSM1 | GCAATATCAAACGTCATGGCCACGGTCGTGGACCAATGTCTCACGGTTCTCATTTCACA<br>*****  |
| ATCC11046<br>SSM1 | GAGCGCCAGGTTCTGTAGGTATGGCATCTGACGCATCTAAAGTATTTAAAGGTCACAAAA<br>***** |
| ATCC11046<br>SSM1 | TGCCAGGTCGTATGGGTGGCAACACAGTGACAGTACAAAACCTAGAAGTTGTACAAATCG<br>***** |
| ATCC11046<br>SSM1 | ATACAGAAAACAACGTTATCTTAGTTAAAGGTAATGTGCCTGGTCCTAAAAAAGGATTAG<br>***** |
| ATCC11046<br>SSM1 | TAGAAATCAAACCTCAATTAAAAAAGGTAACAAATAATTAATTAACGAAAGGAGGAAAA<br>*****  |
| ATCC11046<br>SSM1 | TGCA<br>****                                                          |

## L4 of *S. aureus*

ATCC25923 CAGGACGTATGGGTGGAAACACTGTAAGTGTTCAAAACCTAGAACTAGTTCAAGTTGACA  
SA2 \*\*\*\*\*  
SA3 \*\*\*\*\*  
SA12 \*\*\*\*\*  
SA16 \*\*\*\*\*  
SA17 \*\*\*\*\*  
SA18 \*\*\*\*\*  
SA19 \*\*\*\*\*  
SA20 \*\*\*\*\*  
SA21 \*\*\*\*\*

ATCC25923 CAGAAAACAAAGTTATCTTAGTAAAAGGTAATGTACCTGGACCTAAAAAAGGTTTAGTAG  
SA2 \*\*\*\*\*  
SA3 \*\*\*\*\*  
SA12 \*\*\*\*\*  
SA16 \*\*\*\*\*  
SA17 \*\*\*\*\*  
SA18 \*\*\*\*\*  
SA19 \*\*\*\*\*  
SA20 \*\*\*\*\*  
SA21 \*\*\*\*\*

ATCC25923 AAATCAGAACTTCAATTAAAAAGGTAATAAATAATAAGAAGTGAAAGGAGGAAATGCAT  
SA2 \*\*\*\*\*  
SA3 \*\*\*\*\*  
SA12 \*\*\*\*\*  
SA16 \*\*\*\*\*  
SA17 \*\*\*\*\*  
SA18 \*\*\*\*\*  
SA19 \*\*\*\*\*  
SA20 \*\*\*\*\*  
SA21 \*\*\*\*\*

ATCC25923 AATGGCTAATTATGATGTTTTAAAATTAGACGGAACCTAAATCAGGTTCAATCGAATTAAG  
SA2 \*\*\*\*\*  
SA3 \*\*\*\*\*  
SA12 \*\*\*\*\*  
SA16 \*\*\*\*\*  
SA17 \*\*\*\*\*  
SA18 \*\*\*\*\*  
SA19 \*\*\*\*\*  
SA20 \*\*\*\*\*  
SA21 \*\*\*\*\*

ATCC25923 CGATGCAGTATTCGGTATTGAGCCAAATAATAGCGTTTTATTGCAAGCTATTAATTACA  
SA2 \*\*\*\*\*  
SA3 \*\*\*\*\*  
SA12 \*\*\*\*\*  
SA16 \*\*\*\*\*  
SA17 \*\*\*\*\*  
SA18 \*\*\*\*\*  
SA19 \*\*\*\*\*  
SA20 \*\*\*\*\*  
SA21 \*\*\*\*\*

ATCC25923 ACGTGCTTCATTACGTCAAGGTACGCATGCTGTTAAGAATCGTTCAGCAGTAAGCGGTGG  
SA2 \*\*\*\*\*  
SA3 \*\*\*\*\*  
SA12 \*\*\*\*\*  
SA16 \*\*\*\*\*  
SA17 \*\*\*\*\*  
SA18 \*\*\*\*\*  
SA19 \*\*\*\*\*  
SA20 \*\*\*\*\*

|           |                                                               |
|-----------|---------------------------------------------------------------|
| SA21      | *****                                                         |
| ATCC25923 | CGGACGTAAACCATGGAAGCAAAAAGGAACAGGTCGTGCTCGTCAAGGTACAATCCGTGC  |
| SA2       | *****                                                         |
| SA3       | *****                                                         |
| SA12      | *****                                                         |
| SA16      | *****                                                         |
| SA17      | *****                                                         |
| SA18      | *****                                                         |
| SA19      | *****                                                         |
| SA20      | *****                                                         |
| SA21      | *****                                                         |
| ATCC25923 | TCCACAATGGCGTGGCGGTGGTATCGTATTCCGACCAACTCCAAGAAGTTATGCATACAA  |
| SA2       | *****                                                         |
| SA3       | *****                                                         |
| SA12      | *****                                                         |
| SA16      | *****                                                         |
| SA17      | *****                                                         |
| SA18      | *****                                                         |
| SA19      | *****                                                         |
| SA20      | *****                                                         |
| SA21      | *****                                                         |
| ATCC25923 | AATGCCTAAGAAAATGCGTCGTTAGCTTTACGCTCAGCATTATCTTTCAAAGTTCAAGA   |
| SA2       | *****                                                         |
| SA3       | *****                                                         |
| SA12      | *****                                                         |
| SA16      | *****                                                         |
| SA17      | *****                                                         |
| SA18      | *****                                                         |
| SA19      | *****                                                         |
| SA20      | *****                                                         |
| SA21      | *****                                                         |
| ATCC25923 | GAATGGCTTAACTGTAGTTGACGCATTCAACTTCGAAGCTCCAAAACTAAAGAATTCAA   |
| SA2       | *****                                                         |
| SA3       | *****                                                         |
| SA12      | *****                                                         |
| SA16      | *****                                                         |
| SA17      | *****                                                         |
| SA18      | *****                                                         |
| SA19      | *****                                                         |
| SA20      | *****                                                         |
| SA21      | *****                                                         |
| ATCC25923 | AAATGTATTATCTACATTAGAACAACCTAAAAAGTATTAGTAGTTACTGAAAACGAAGA   |
| SA2       | *****                                                         |
| SA3       | *****                                                         |
| SA12      | *****                                                         |
| SA16      | *****                                                         |
| SA17      | *****                                                         |
| SA18      | *****                                                         |
| SA19      | *****                                                         |
| SA20      | *****                                                         |
| SA21      | *****                                                         |
| ATCC25923 | TGTAAATGTTGAATTATCAGCACGCAACATCCCTGGCGTTCAAGTGACAAC TGCTCAAGG |
| SA2       | *****                                                         |
| SA3       | *****                                                         |
| SA12      | *****                                                         |
| SA16      | *****                                                         |
| SA17      | *****                                                         |
| SA18      | *****                                                         |
| SA19      | *****                                                         |
| SA20      | *****                                                         |
| SA21      | *****                                                         |

|           |                                                              |
|-----------|--------------------------------------------------------------|
| ATCC25923 | TTTAAATGTTTTAGATATCACTAATGCTGACAGCTTAGTAATTACTGAAGCTGCTGCTAA |
| SA2       | *****                                                        |
| SA3       | *****                                                        |
| SA12      | *****                                                        |
| SA16      | *****                                                        |
| SA17      | *****                                                        |
| SA18      | *****                                                        |
| SA19      | *****                                                        |
| SA20      | *****                                                        |
| SA21      | *****                                                        |

|           |                                                              |
|-----------|--------------------------------------------------------------|
| ATCC25923 | AAAAGTTGAGGAGGTGCTCGGATAATGGAAGCAAGAGATATTCTTAAGCGCCCCGTAATC |
| SA2       | *****                                                        |
| SA3       | *****                                                        |
| SA12      | *****                                                        |
| SA16      | *****                                                        |
| SA17      | *****                                                        |
| SA18      | *****                                                        |
| SA19      | *****                                                        |
| SA20      | *****                                                        |
| SA21      | *****                                                        |

|           |                                                              |
|-----------|--------------------------------------------------------------|
| ATCC25923 | ACTGAGAAATCTTCTGAAGCAATGGCTGAAGACAAATACACTTTCGACGTTGATACTCGT |
| SA2       | *****                                                        |
| SA3       | *****                                                        |
| SA12      | *****                                                        |
| SA16      | *****                                                        |
| SA17      | *****                                                        |
| SA18      | *****                                                        |
| SA19      | *****                                                        |
| SA20      | *****                                                        |
| SA21      | *****                                                        |

|           |                                 |
|-----------|---------------------------------|
| ATCC25923 | GTTAACAAAACACAAGTGAAAATGGCAGTTG |
| SA2       | *****                           |
| SA3       | *****                           |
| SA12      | *****                           |
| SA16      | *****                           |
| SA17      | *****                           |
| SA18      | *****                           |
| SA19      | *****                           |
| SA20      | *****                           |
| SA21      | *****                           |

## L4 of *S. epidermidis*

|           |                                                               |
|-----------|---------------------------------------------------------------|
| ATCC12228 | GAAGCGAAAGGAGGAAATTGCATAATGGCTAATTATGATGTTTTAAAAGTAGACGGATCA  |
| SE7       | *****                                                         |
| SE9       | *****                                                         |
| SE10      | *****                                                         |
| ATCC12228 | AAATCAGGTTCAAGTTGAATTAAACGATGCAGTATTTGCTATCGAACCTAATAATAGCGTT |
| SE7       | *****                                                         |
| SE9       | *****                                                         |
| SE10      | *****                                                         |
| ATCC12228 | CTTTTGAAGCTATTAACCTACAACGTGCGTCATTACGCCAAGGTACTCACGCTGTTAAG   |
| SE7       | *****                                                         |
| SE9       | *****                                                         |
| SE10      | *****                                                         |
| ATCC12228 | AATCGTTCAGCAGTACGTGGTGGTGGACGTAAACCATGGAGACAAAAAGGTACAGGTCGT  |
| SE7       | *****                                                         |
| SE9       | *****                                                         |
| SE10      | *****                                                         |
| ATCC12228 | GCACGTCAAGGTACAATCCGTGCTCCACAATGGCGTGGTGGTGGTGTAGTATTCGGACCA  |
| SE7       | *****                                                         |
| SE9       | *****                                                         |
| SE10      | *****                                                         |
| ATCC12228 | ACACCAAGAAGCTATGCATATAAAATGCCAAAGAAAATGCGTCGTTTAGCATTACGTTCT  |
| SE7       | *****                                                         |
| SE9       | *****                                                         |
| SE10      | *****                                                         |
| ATCC12228 | GCATTATCTTTTAAAGTTCAAGAAAATAGCTTTACAATTGTAGATACTTTTGGTTTGA    |
| SE7       | *****                                                         |
| SE9       | *****                                                         |
| SE10      | *****                                                         |
| ATCC12228 | GCACCAAAAACAAAAGAATTCAAAAATGTATTAACCTACTCTTGAACAACCTAAGAAAGTA |
| SE7       | *****                                                         |
| SE9       | *****                                                         |
| SE10      | *****                                                         |
| ATCC12228 | TTAGTTGTAACAGAAAACGAAGATGTAAATGTTGAATTATCAGCACGTAACATTCCTGGT  |
| SE7       | *****                                                         |
| SE9       | *****                                                         |
| SE10      | *****                                                         |
| ATCC12228 | GTTCAAGTTACAACCTGCTCAAGGATTAAATGTACTTGATCTAACAAGCGCTGACAGTGTA |
| SE7       | *****                                                         |
| SE9       | *****                                                         |
| SE10      | *****                                                         |
| ATCC12228 | ATCATTACAGAAGCAGCTGCGAAAAAGTTGAGGAGGTGCTCGCATAATGGAAGCAAGAG   |
| SE7       | *****                                                         |
| SE9       | *****                                                         |
| SE10      | *****                                                         |
| ATCC12228 | ATGTTCTTAAGCGCCCCGTAATCACTGAAAAATCTTCTGAAGCTATGGCAGAAGATAAAT  |
| SE7       | *****                                                         |
| SE9       | *****                                                         |
| SE10      | *****                                                         |
| ATCC12228 | ACACTTTCGATGTAGATACTCGTGCAAATAAAACACAAGTTAAAATTGCTGTTGAAGAAA  |
| SE7       | *****                                                         |
| SE9       | *****                                                         |
| SE10      | *****                                                         |

|           |         |
|-----------|---------|
| ATCC12228 | TCTTCGA |
| SE7       | *****   |
| SE9       | *****   |
| SE10      | *****   |

# L4 of *S. sciuri*

|           |                                                               |
|-----------|---------------------------------------------------------------|
| NCTC12103 | GGTAACGTGCCAGGTCCTAAAAAAGGTTTAGTAAAACCTTACAACTTCAATTAAAAAAGGT |
| SSC1      | *****                                                         |
| SSC2      | *****                                                         |
| NCTC12103 | AATAAATAATTATTTAGGTGAAAGGAGGAAACAACATTATGGCTAATATTGATGTATTAA  |
| SSC1      | *****                                                         |
| SSC2      | *****                                                         |
| NCTC12103 | AAGTAGATGGATCAAAATCAGGTTCTATCGAATTAAATGATAGTGTATTTGGTATCGAAC  |
| SSC1      | *****                                                         |
| SSC2      | *****                                                         |
| NCTC12103 | CAAACCAACACGTATTATTCTGAAGCAGTCAACTTACAACGTGCTTCATTACGCCAAGGTA |
| SSC1      | *****                                                         |
| SSC2      | *****                                                         |
| NCTC12103 | CTCACGCAGTTAAAAATCGTTCAGCAGTTCGTGGTGGTGGACGTAAACCTTGGAACAAA   |
| SSC1      | *****                                                         |
| SSC2      | *****                                                         |
| NCTC12103 | AAGGTACAGGTCGTGCTCGTCAAGGTACAATCCGTGCGCCACAATGGCGTGGTGGTGGTA  |
| SSC1      | *****                                                         |
| SSC2      | *****                                                         |
| NCTC12103 | TCGTATTTCGGTCCTACACCAAGAAGTTATTCTTACAAAATGCCTAAGAAAATGCGTCGTT |
| SSC1      | *****                                                         |
| SSC2      | *****                                                         |
| NCTC12103 | TAGCATTACGTTCTGCATTATCTTCAAAAGTAAGTGGTAACGAATTAACAGTTTGTAGAAG |
| SSC1      | *****                                                         |
| SSC2      | *****                                                         |
| NCTC12103 | CATTCAACTTTGATGCACCTAAAACAAAAGAATTCAAAAATGTAATGAGCAACTTAGAAC  |
| SSC1      | *****                                                         |
| SSC2      | *****                                                         |
| NCTC12103 | TTTCTAAGAAAGTTTATTTCATCGTTGATACTGTAGACAGCAACGTTGAATTATCAGCTC  |
| SSC1      | *****                                                         |
| SSC2      | *****                                                         |
| NCTC12103 | GTAACATTCCAGGTGTTAAAGTTATCGACGCTCAAAGCTTAAACGTATTAGATATCTTAG  |
| SSC1      | *****                                                         |
| SSC2      | *****                                                         |
| NCTC12103 | ATTCTAGTAAAGTCGTAATAACTAAAGCAGCAGTGGATAAAGTAGAGGAGGTGCTCGCAT  |
| SSC1      | *****                                                         |
| SSC2      | *****                                                         |
| NCTC12103 | AATGGAAGCAAGAGATGTTATTAAGCGCCCCGTAATCACAGAAAAATCTTCATCAGATAT  |
| SSC1      | *****                                                         |
| SSC2      | *****                                                         |
| NCTC12103 | GGCTTTAGATAAAATACACATTTGATGTAGATACACGTGCAAACAAAACACAAGTAAAAAT |
| SSC1      | *****                                                         |
| SSC2      | *****                                                         |
| NCTC12103 | CGCAATCGAAGAAATTTTC                                           |
| SSC1      | *****                                                         |
| SSC2      | *****                                                         |

# L4 of *S. simulans*

|                   |                                                                        |
|-------------------|------------------------------------------------------------------------|
| ATCC11046<br>SSM1 | AAAGGTAATGTGCCTGGTCCTAAAAAAGGATTAGTAGAAATCAAACCTTCAATTAAAAAA<br>*****  |
| ATCC11046<br>SSM1 | GGTAACAAATAATTAATTAACGAAAGGAGGAAAATGCATAATGGCAAATTATGATGTATT<br>*****  |
| ATCC11046<br>SSM1 | AAAAGTAGACGGATCAAAGCAGGTTCAAGTTGAATTAAGCGATGCTGTATTTCGCAATTGA<br>***** |
| ATCC11046<br>SSM1 | ACCAAACAAAGATGTTCTTTTCGAAGCAATTAACCTACAACGTGCTTCATTACGCCAAGG<br>*****  |
| ATCC11046<br>SSM1 | TACGCATTTCGGTAAAAAACCGTTCAGCAGTACGCGGCGGTGGACGTAAACCATGGAGACA<br>***** |
| ATCC11046<br>SSM1 | AAAAGGTACAGGACGTGCGCGTCAAGGTACTATCCGTGCTCCACAATGGCGTGGTGGCGG<br>*****  |
| ATCC11046<br>SSM1 | TATCGTATTCGACCGACTCCAAGAAGCTATGCATACAAAATGCCTAAGAAAATGCGTCG<br>*****   |
| ATCC11046<br>SSM1 | TTTAGCATTACGTTCTGCATTATCTTTCAAAGTACAAGAAAATGAATTCAAATTATTGA<br>*****   |
| ATCC11046<br>SSM1 | TGCTTTCGGTTTAGAAGCACCAAAACTAAAGAATTCACTAAAGTATTATCAAACCTAGA<br>*****   |
| ATCC11046<br>SSM1 | ATTACCTAAAAAGTTTTAGTAGTTACTGAATCAGAAGATGTAAATGTTGAATTATCAGC<br>*****   |
| ATCC11046<br>SSM1 | ACGTAACATTCCTGGTGTTCAAATCACTACTGTAACGTGTTTAAACGTATTAGACATCAC<br>*****  |
| ATCC11046<br>SSM1 | TAGCGCTGACAGTGTTAATTACAGAAGCAGCTGCTAAAAAAGTTGAGGAGGTGCTCGG<br>*****    |
| ATCC11046<br>SSM1 | ATAATGGAAGCAAGAGACGTTCTTAAGCGCCCGTAATCACAGAAAAATCTTCAGAAGCA<br>*****   |
| ATCC11046<br>SSM1 | ATGGCTGAAGACAAATACACTTTTGATGTAGATACAGTGCGA<br>*****                    |

## L22 of *S. aureus*

ATCC25923 GCTCAAGAAGGAAGCGAAAAGAAACAAGTAATCAAAACATGGTCACGTCGTTCTACAATT  
SA2 \*\*\*\*\*  
SA3 \*\*\*\*\*  
SA12 \*\*\*\*\*  
SA16 \*\*\*\*\*  
SA17 \*\*\*\*\*  
SA18 \*\*\*\*\*  
SA19 \*\*\*\*\*  
SA20 \*\*\*\*\*  
SA21 \*\*\*\*\*

ATCC25923 TTCCCTAATTTTCATCGGACATACTTTTGCAGTATACGACGGACGTAAACACGTACCTGTA  
SA2 \*\*\*\*\*  
SA3 \*\*\*\*\*  
SA12 \*\*\*\*\*  
SA16 \*\*\*\*\*  
SA17 \*\*\*\*\*  
SA18 \*\*\*\*\*  
SA19 \*\*\*\*\*  
SA20 \*\*\*\*\*  
SA21 \*\*\*\*\*

ATCC25923 TATGTAAGTGAAGATATGGTAGGTCATAAATTAGGTGAGTTTGCTCCTACTCGTACATTC  
SA2 \*\*\*\*\*  
SA3 \*\*\*\*\*  
SA12 \*\*\*\*\*  
SA16 \*\*\*\*\*  
SA17 \*\*\*\*\*  
SA18 \*\*\*\*\*  
SA19 \*\*\*\*\*  
SA20 \*\*\*\*\*  
SA21 \*\*\*\*\*

ATCC25923 AAAGGACACGTTGCAGACGACAAGAAAACAAGAAGATAATATCTATTAAGTAGAGGAGGA  
SA2 \*\*\*\*\*  
SA3 \*\*\*\*\*  
SA12 \*\*\*\*\*  
SA16 \*\*\*\*\*  
SA17 \*\*\*\*\*  
SA18 \*\*\*\*\*  
SA19 \*\*\*\*\*  
SA20 \*\*\*\*\*  
SA21 \*\*\*\*\*

ATCC25923 CATCCTAATGGAAGCAAAAGCGGTTGCTAGACAATAAGAATCGCACCTCGTAAAGTAAG  
SA2 \*\*\*\*\*  
SA3 \*\*\*\*\*  
SA12 \*\*\*\*\*  
SA16 \*\*\*\*\*  
SA17 \*\*\*\*\*  
SA18 \*\*\*\*\*  
SA19 \*\*\*\*\*  
SA20 \*\*\*\*\*  
SA21 \*\*\*\*\*

ATCC25923 ACTAGTTCTTGACTTAATCAGAGGTAAAAATGCTGCTGAAGCTATTGCAATTTTAAAAATT  
SA2 \*\*\*\*\*  
SA3 \*\*\*\*\*  
SA12 \*\*\*\*\*  
SA16 \*\*\*\*\*  
SA17 \*\*\*\*\*  
SA18 \*\*\*\*\*  
SA19 \*\*\*\*\*

SA20 \*\*\*\*\*  
SA21 \*\*\*\*\*

ATCC25923 AACAAACAAAGCTTCATCACCAGTAATTGAAAAAGTATTAATGTCCGCTTTAGCTAATGC  
SA2 \*\*\*\*\*  
SA3 \*\*\*\*\*  
SA12 \*\*\*\*\*  
SA16 \*\*\*\*\*  
SA17 \*\*\*\*\*  
SA18 \*\*\*\*\*  
SA19 \*\*\*\*\*  
SA20 \*\*\*\*\*  
SA21 \*\*\*\*\*

ATCC25923 TGAACATAACTATGACATGAACACAGATGAATTAGTAGTTAAAGAAGCATATGCTAACGA  
SA2 \*\*\*\*\*  
SA3 \*\*\*\*\*  
SA12 \*\*\*\*\*  
SA16 \*\*\*\*\*  
SA17 \*\*\*\*\*  
SA18 \*\*\*\*\*  
SA19 \*\*\*\*\*  
SA20 \*\*\*\*\*  
SA21 \*\*\*\*\*

ATCC25923 AGGACCAACATTAAAACGTTTCCGTCCACGTGCGCAAGGTCGTGCAAGTGCGATTAAACAA  
SA2 \*\*\*\*\*  
SA3 \*\*\*\*\*  
SA12 \*\*\*\*\*  
SA16 \*\*\*\*\*  
SA17 \*\*\*\*\*  
SA18 \*\*\*\*\*  
SA19 \*\*\*\*\*  
SA20 \*\*\*\*\*  
SA21 \*\*\*\*\*

ATCC25923 ACGTACAAGCCACATTACAATCGTCGTAAGTGACGGTAAAGAAGAAGCTAAAGAAGCTTA  
SA2 \*\*\*\*\*  
SA3 \*\*\*\*\*  
SA12 \*\*\*\*\*  
SA16 \*\*\*\*\*  
SA17 \*\*\*\*\*  
SA18 \*\*\*\*\*  
SA19 \*\*\*\*\*  
SA20 \*\*\*\*\*  
SA21 \*\*\*\*\*

ATCC25923 ATTAAC TTTTAAGGAGGGAATACTGTGGGTCAAAAAATTAATCCAATCGGACTTCGTGTT  
SA2 \*\*\*\*\*  
SA3 \*\*\*\*\*  
SA12 \*\*\*\*\*  
SA16 \*\*\*\*\*  
SA17 \*\*\*\*\*  
SA18 \*\*\*\*\*  
SA19 \*\*\*\*\*  
SA20 \*\*\*\*\*  
SA21 \*\*\*\*\*

ATCC25923 GGTATTATCCGTGATTGGAAGCTAAATGGTATGCTGAAAAAGACTTCGCTTCACTTTTA  
SA2 \*\*\*\*\*  
SA3 \*\*\*\*\*  
SA12 \*\*\*\*\*  
SA16 \*\*\*\*\*  
SA17 \*\*\*\*\*  
SA18 \*\*\*\*\*  
SA19 \*\*\*\*\*  
SA20 \*\*\*\*\*

```
SA21 *****

ATCC25923 CACGAAGATTTAAAAATCCGTAAATTTATTGATAATGAATTAAAAGAAGCATCAGTTTCT
SA2 *****
SA3 *****
SA12 *****
SA16 *****
SA17 *****
SA18 *****
SA19 *****
SA20 *****
SA21 *****

ATCC25923 CACGTAGAGATTGAACGTGCTGCAAACCGTATCAACATTGCAATTCATACTGGTAAACCT
SA2 *****
SA3 *****
SA12 *****
SA16 *****
SA17 *****
SA18 *****
SA19 *****
SA20 *****
SA21 *****

ATCC25923 GGTATGGTAATTGGTAAAGGCGGTTTCAGAAATCGAAAAATTACGCAACAAATTAAATGCG
SA2 *****
SA3 *****
SA12 *****
SA16 *****
SA17 *****
SA18 *****
SA19 *****
SA20 *****
SA21 *****
```

## L22 of *S. epidermidis*

ATCC12228 CATTGGCCATACTTTTGCAGTATACGATGGACGTAAACATGTACCTGTATATGTCACTGA  
SE7 \*\*\*\*\*  
SE9 \*\*\*\*\*  
SE10 \*\*\*\*\*

ATCC12228 AGATATGGTAGGTCACAAATTAGGTGAATTTGCTCCTACACGTACTTTTAAAGGACATGC  
SE7 \*\*\*\*\*  
SE9 \*\*\*\*\*  
SE10 \*\*\*\*\*

ATCC12228 AGCAGACGACAAGAAAACAAGAAGATAATTTTAATAAGTAGAGGAGGAAATCCTGATGGA  
SE7 \*\*\*\*\*  
SE9 \*\*\*\*\*  
SE10 \*\*\*\*\*

ATCC12228 AGCAAAAGCGGTTGCTAGAACAAATAAGAATCGCACCTCGTAAAGTAAGACTTGTCTTGA  
SE7 \*\*\*\*\*  
SE9 \*\*\*\*\*  
SE10 \*\*\*\*\*

ATCC12228 TTTAATCAGAGGTAAAAATGCTGGAGAAGCTATTGCTATTTTAAATTAAC TAATAAAGC  
SE7 \*\*\*\*\*  
SE9 \*\*\*\*\*  
SE10 \*\*\*\*\*

ATCC12228 TTCATCACCAGTAATCGAAAAAGTATTAATGTCCGCTTTGGCAAATGCTGAGCACAACTA  
SE7 \*\*\*\*\*  
SE9 \*\*\*\*\*  
SE10 \*\*\*\*\*

ATCC12228 TGATATGAATACAGATGAATTAGTTGTAAAAGAAGCATATGCTAATGAAGGACCAACTTT  
SE7 \*\*\*\*\*  
SE9 \*\*\*\*\*  
SE10 \*\*\*\*\*

ATCC12228 AAAACGTTTCCGCCCACGTGCACAAGGACGTGCAAGTGCAATTAATAAACGTACAAGCCA  
SE7 \*\*\*\*\*  
SE9 \*\*\*\*\*  
SE10 \*\*\*\*\*

ATCC12228 CATTACAATCGTCGTAAGTGACGGTAAAGAAGAAGCTAAAGAAGCTTAATAACTTTCTAA  
SE7 \*\*\*\*\*  
SE9 \*\*\*\*\*  
SE10 \*\*\*\*\*

ATCC12228 GGAGGGAATACTGTGGGTCAAAAAATTAATCCAATCGGACTTCGTGTCGGTGTTATCCGT  
SE7 \*\*\*\*\*  
SE9 \*\*\*\*\*  
SE10 \*\*\*\*\*

ATCC12228 GATTGGGAAGCAAAATGGTATGCTGAAAAGACTTTGCTTCAC TTTACATGAAGACTTA  
SE7 \*\*\*\*\*  
SE9 \*\*\*\*\*  
SE10 \*\*\*\*\*

ATCC12228 AAAATCCGTAAATTTATTGATAATGAATTAAGAAGCGTCAGTTTCTCACGTAGATATT  
SE7 \*\*\*\*\*  
SE9 \*\*\*\*\*  
SE10 \*\*\*\*\*

ATCC12228 GAACGTGCAGCAAATCGCATCAATATTGC  
SE7 \*\*\*\*\*  
SE9 \*\*\*\*\*  
SE10 \*\*\*\*\*

L22 of *S. sciuri*

```
NCTC12103      TGGTCTCGTCGTTCAACAGTATTTCTTAACCTCATCGGACATACAATAGCAGTATATGAT
SSC1            *****
SSC2            *****

NCTC12103      GGTCGTAAACATGTGCCAGTTTTCTTACTGAAGATATGGTTGGACATAAATTAGGAGAG
SSC1            *****
SSC2            *****

NCTC12103      TTTGCACCTACACGTACTTATAAAGGTCATGCTGCAGACGACAAAAAGACTAAACGCTAA
SSC1            *****
SSC2            *****

NCTC12103      TTTCTAAAAAGAGGAGGAAGTCACAATGGAAGCAAAAGCGGTTGCTAGAACAAATAAGAAT
SSC1            *****
SSC2            *****

NCTC12103      CGCACCTCGTAAAGTGAGATTAGTTTATAGATCTTATTAGAGGTAAAGAAGTGGCAGAAGC
SSC1            *****
SSC2            *****

NCTC12103      AATTGCCATCTTAAAATTAACAAACAAAGCAACATCACCTGTTGTTGAAAAATTATTAAT
SSC1            *****
SSC2            *****

NCTC12103      GTCAGCATTAGCAAATGCAGAACATAACTATGATTTAAATCCTGACACATTAGTAGTAAA
SSC1            *****
SSC2            *****

NCTC12103      AGAAGCTTACGCTAATGAAGGACCTACATTGAAACGTTTCCGTCCACGTGCACAAGGTCG
SSC1            *****
SSC2            *****

NCTC12103      TGCAAGTGCGATTAAACAAACGTACTAGCCATATTACAATCGTAGTTGGCGAAAAAGAAGC
SSC1            *****
SSC2            *****

NCTC12103      TAAAGAAGTTAAAGAAGCATAATTAACATAATCATTAAAGGAGGGAATATAGTGGGTCAA
SSC1            *****
SSC2            *****

NCTC12103      AAATTAATCCAATCGGACTTCGTGTCGGTGTAATTCGTGACTGGGAAGCAAAGTGGTATG
SSC1            *****
SSC2            *****

NCTC12103      CAGGTAAAGACTTCGCAACACTTTTACATGAAGACTTAAAAGTTCGTAAATATATCGCAG
SSC1            *****
SSC2            *****

NCTC12103      AAGCATTAAAAGAAGCTTCAGTTTCAAGTGTTGAAATTGAACGTGCAGCAAA
SSC1            *****
SSC2            *****
```

L22 of *S. simulans*

|                   |                                                                       |
|-------------------|-----------------------------------------------------------------------|
| ATCC11046<br>SSM1 | GACATGCTGCAGACGACAAAAAACAAGAAGATAAAATACTTTCTATTAAGTAGAGGAGGA<br>***** |
| ATCC11046<br>SSM1 | AGACCAAATGGAAGCAAAAGCGGTTGCTAGAACTATCAGAATCGCACCTCGTAAAGTCAG<br>***** |
| ATCC11046<br>SSM1 | ATTAGTTTTAGACTTAATCAGAGGCAAAAACGTTGGTGAAGCTGTTGCTATTTTAAAATT<br>***** |
| ATCC11046<br>SSM1 | AACTAACAAAGCATCATCACCAGTTGTTGAAAAATTATTAATGTCCGCTTTAGCTAATGC<br>***** |
| ATCC11046<br>SSM1 | AGAGCACAACTATGACATGAATACAGATGAATTAGTTGTTAAAGAAGCATATGCTAACGA<br>***** |
| ATCC11046<br>SSM1 | AGGACCAACTTTAAAACGTTTCCGTCCACGTGCTCAAGGACGCGCAAGTGCAATTAACAA<br>***** |
| ATCC11046<br>SSM1 | ACGTACAAGCCACATTACAATTGTCGTAAGTGACGGCAAAGAAGAAGCTAAAGAAGCTTA<br>***** |
| ATCC11046<br>SSM1 | ATAAACTATCTAAGGAGGGAATACTGTGGGTCAAAAAATTAATCCAATCGGACTTCGTGT<br>***** |
| ATCC11046<br>SSM1 | TGGTGTTATCCGTGATTGGGACGCTAAATGG<br>*****                              |
